# Supplementary material for: Comparative study of chemical characterization and source apportionment of PM2.5 in South China by filter-based and single particle analysis
Source: Oxford University Press journal article supplement (doi:10.1525/elementa.2021.00046), 2021-01-01
Supplement: manuscripts-elementa-d-20-00046_data_filer3.xlsx [file manuscripts-elementa-d-20-00046_data_filer3.xlsx]

## Sheet: Concentration_SPAMS
Summary of number concentration based on Single particle analysis (# cm-3)
Ion	Min	Max	Average	Median	STD
Total	26	3833	667	529	576
Ag	0	114	26	23	17
As	0	216	17	8	28
Br	0	163	8	5	15
Ca	0	147	13	9	18
Cd	0	156	13	8	15
Cl	10	1361	181	117	193
Co	0	56	3	1	6
Cr	0	118	9	4	14
Cu	0	13	1	1	2
F	0	37	3	2	4
Fe	0	467	75	54	79
Ga	0	59	5	3	7
Ge	0	9	0	0	1
Hg	0	19	1	1	3
In	0	220	13	5	27
K	25	3792	652	514	569
K2Cl	0	33	2	1	3
La	0	40	2	0	4
Li	0	419	29	16	41
Mg	0	334	30	20	34
Mn	0	325	52	39	49
Mo	0	221	49	40	37
Na	9	1712	285	219	266
Ni	0	32	2	1	3
Pb	0	93	6	4	9
Ti	0	40	2	1	3
V	0	186	7	3	16
Zn	0	91	1	0	7
NH4	7	2453	332	234	334
NO3	0	3941	608	480	593
SO4	18	3447	579	464	507
SIO3	0	202	22	13	27
PO3	0	317	29	19	34
CN	21	2221	377	287	330
PAHS	7	2165	281	198	309
C3H7	0	23	1	0	3
EC	16	2220	409	321	334
OC	14	2919	416	306	420
ECOC	0	583	38	17	76
LEV	1	265	30	15	40
		35062	5276

## Sheet: Concentration_filter
Summary of concentration of chemical species based on filter analysis (ug m-3)
Species	Min	Max	Average	Median	STD
PM2.5	19	93	42	41	16
OC	2.6	24.1	8	7	4.5
EC	0.3	21.7	5.1	4.1	4.3
Al	0.0067	0.2659	0.0745	0.0467	0.0691
Ca	0.3407	1.998	0.7205	0.6275	0.2883
Fe	0.0002	0.2322	0.0698	0.0497	0.0601
Mg	0.0464	0.162	0.0888	0.0839	0.0315
Ti	0.0025	0.0152	0.0063	0.0056	0.0025
K	0.0488	1.0554	0.4052	0.38	0.2168
Na	0.8794	2.9892	1.5032	1.3746	0.4751
V	0.0002	0.0015	0.0004	0.0003	0.0004
Cr	0.0007	0.0074	0.0029	0.0027	0.0012
Mn	0.0021	0.0246	0.0088	0.008	0.0052
Ni	0.0001	0.0023	0.0004	0.0002	0.0005
Cu	0.0007	0.0237	0.0061	0.0041	0.0052
Zn	0.0001	0.0768	0.0195	0.0153	0.0171
As	0.0001	0.05	0.0087	0.0049	0.0102
Cd	0.0001	0.0046	0.0012	0.0009	0.001
Pb	0.0004	0.0831	0.0277	0.0192	0.0226
Ba	0.0033	0.0926	0.0175	0.0107	0.0187
Hg	0.0001	0.0007	0.0002	0.0001	0.0002
NH4+	0.0001	11.1519	3.7907	3.4861	2.5806
NO3-	0.0848	9.2762	2.1405	1.5423	1.9956
SO42-	0.2057	21.4025	9.7263	9.9879	4.7507
Cl-	0.0001	2.5633	0.8082	0.6419	0.6335
Mg2+	0.0001	1.9659	0.1156	0.0618	0.2933
F-	0.0001	0.2183	0.0305	0.004	0.0475

## Sheet: PMF-factor contribution filter
Contribution of each source to chemical species in PM2.5 based on filter analysis resolved by PMF
	Concentration ug m-3							Percentage (%)
Species	Fossil fuel combustion	Dust	Traffic	Industry	Biomass burning	Secondary aerosol		Fossil fuel combustion	Dust	Traffic	Industry	Biomass burning	Secondary aerosol
PM2.5	6.5827	3.3465	6.4919	9.9917	5.1419	11.963		15.1265	7.68997	14.9178	22.9601	11.8156	27.49
OC	0.91503	0.31132	2.0655	1.869	0.69072	1.74385		12.0471	4.09879	27.194	24.6069	9.0939	22.9592
EC	0.81021	0	3.0207	0.63536	0	0.49301		16.3373	0	60.91	12.8115	0	9.94116
Al	0.03486	0.0348	0.01279	0	0.0129	0		36.5603	36.4952	13.4188	0	13.5258	0
Ca	0.01583	0.43246	0.03896	0.01136	0.11161	0.04997		2.3975	65.5056	5.9015	1.72012	16.9058	7.56951
Fe	0.08386	0.01135	0.00566	0	0	0.00459		79.5179	10.7629	5.36513	0	0	4.35408
Mg	0	0.02309	0.00343	0.00154	0.05086	0.01844		0	23.7187	3.51877	1.58672	52.2371	18.9388
Ti	0.00187	0.00291	0	0.00055878	0.00113	0.0006878		26.1055	40.686	0	7.79942	15.8088	9.60027
K	0.1489	0	0.00279	0.30344	0.12325	0		25.7445	0	0.48152	52.4642	21.3097	0
Na	0	0.0859	0	0	1.4043	0.47299		0	4.37578	0	0	71.5314	24.0929
V	0.00014005	0	0	0.00022935	0.00014496	0.00022885		18.8439	0	0	30.8594	19.5046	30.7921
Mn	0.005	0.00187	0.00080499	0.00137	0.00025225	0.00099254		48.5648	18.1856	7.82259	13.3306	2.45127	9.64513
Cu	0.00045438	0.00064595	0	0.00094014	0.00366	0.00213		5.80309	8.24971	0	12.0069	46.755	27.1853
Zn	0.0338	0	0	0.00796	0	0.00422		73.5159	0	0	17.3101	0	9.17399
As	0.00127	0	0.00155	0	0.00317	0.00363		13.1744	0	16.1054	0	32.9776	37.7425
Cd	0.00028419	0	0.0001517	0	0.00035084	0.00054595		21.3247	0	11.3831	0	26.3259	40.9663
Pb	0.01224	0	0.00625	0	0.00332	0.00863		40.2047	0	20.5309	0	10.9159	28.3485
Ba	0	0.00185	0.00533	0	0.00059256	0.00111		0	20.875	59.9868	0	6.67225	12.466
NH4	0	0.28955	0.0058	0	0	3.16063		0	8.37824	0.16772	0	0	91.454
NO3	0.1502	0	0	0	0	1.89792		7.33355	0	0	0	0	92.6664
SO4	0.17979	1.0499	0	0.51749	0.67751	7.2917		1.85038	10.8055	0	5.32595	6.97286	75.0454
Cl	0	0	0.11653	0.10576	0.00766	0.30064		0	0	21.9626	19.9327	1.44314	56.6616

## Sheet: PMF-factor contribution SPAMS
Contribution of each source to chemical species in PM2.5 based on SPAMS analysis resolved by PMF
conc. of species	#. m-3							Percentage (%)
	Fossil fuel combustion	Dust	Traffic	Industry	Biomass burning	Secondary aerosol		Fossil fuel combustion	Dust	Traffic	Industry	Biomass burning	Secondary aerosol
Ag	12.683	2.7003	2.0069	1.4372	3.67009	0.51446		55.1148	11.7343	8.72112	6.24545	15.9486	2.23562
As	1.6142	0.01239	0.16829	0.90917	14.3905	0		9.44278	0.07247	0.98447	5.31848	84.1818	0
Br	0	1.0145	3.6737	0.60645	0.51923	0.04195		0	17.3246	62.7357	10.3563	8.86689	0.71643
Ca	0	5.6886	0.61995	0.42713	2.06803	1.3922		0	55.793	6.08038	4.18923	20.2829	13.6545
Cd	0.44718	0	1.2524	0.27005	7.2743	0		4.83755	0	13.5483	2.92138	78.6927	0
Cl	21.903	11.776	51.43	1.9947	53.33	15.158		14.0772	7.56853	33.0545	1.28201	34.2756	9.74216
Co	0.14696	0.01042	0.04955	0.59053	0.88671	0.14357		8.04054	0.57005	2.711	32.3093	48.514	7.85506
Cr	0.16829	0.33949	0.02271	0.28376	4.7176	0		3.0422	6.13701	0.41046	5.12957	85.2807	0
Cu	0.30152	0.13147	0.02373	0.6109	0.0825	0.0341		25.4615	11.1018	2.00402	51.5867	6.96662	2.87928
F	0.18919	0.20954	0.60867	0.56755	0.10972	0		11.2301	12.438	36.1299	33.6891	6.51285	0
Fe	4.4447	23.529	3.856	0	21.125	17.544		6.30466	33.3751	5.4696	0	29.9651	24.8856
Ga	0	0	0.14572	0.57829	2.00552	0.49182		0	0	4.52357	17.9518	62.2571	15.2675
Ge	0.29369	0.04068	0.00979	0.60058	0.06877	0.01227		28.6308	3.96566	0.95474	58.5485	6.70416	1.19606
Hg	0.28602	0.03994	0.05494	0.61405	0.07196	0.05126		25.5792	3.57163	4.91355	54.9154	6.43567	4.58453
In	1.0463	0	0	0.86805	11.903	0.59165		7.26143	0	0	6.02436	82.6081	4.10611
K	159.23	79.14	82.232	7.801	63.9	231.41		25.5294	12.6885	13.1843	1.25074	10.2451	37.102
K2Cl	0.26048	0	0.07885	0.62785	0.29229	0.07203		19.5628	0	5.92202	47.1534	21.9521	5.40959
La	0.27057	0.01261	0.0092	0.62269	0.43902	0.04139		19.389	0.90392	0.6596	44.6218	31.46	2.96571
Li	0.74511	10.495	8.1934	0.88761	1.2964	0		3.44679	48.5486	37.9017	4.10598	5.99699	0
Mg	2.4101	8.9064	7.9144	0.86029	1.57749	1.4074		10.4442	38.5958	34.297	3.72806	6.83604	6.09896
Mn	3.6086	11.747	0.41504	0	10.0556	24.464		7.17555	23.3584	0.82529	0	19.9951	48.6456
Mo	17.512	2.782	3.0381	1.1021	18.1383	0		41.1345	6.53473	7.1363	2.58876	42.6057	0
Na	53.301	68.196	53.692	4.5482	10.529	83.579		19.4639	24.9031	19.6067	1.66087	3.84487	30.5205
Ni	0.32673	0.09129	0	0.61394	0.05115	0.05083		28.8137	8.05044	0	54.1423	4.51127	4.48226
Pb	0.10454	3.3173	0	0.5676	0.70479	0.29453		2.09551	66.4954	0	11.3776	14.1276	5.90387
Ti	0.30306	0.33006	0.01477	0.58169	0.04737	0.12822		21.5675	23.489	1.05083	41.3964	3.37141	9.12487
V	0.31228	0.15842	0.30665	0.38052	1.6947	0.07914		10.6518	5.40367	10.4598	12.9795	57.8059	2.69942
Zn	0.30477	0.04117	0	0.59913	0.11277	0		28.8106	3.8917	0	56.6371	10.6606	0
NH4	56.826	61.098	24.993	1.9659	2.8373	170.98		17.8305	19.171	7.84217	0.61685	0.89027	53.6492
NO3	132.32	81.69	75.577	6.08	52.002	256.15		22.3765	13.8145	12.7808	3.13	63.64	93
SO4	139.35	74.674	62.846	6.3788	55.776	211.65		25.3053	13.5604	11.4125	1.15836	10.1287	38.4347
SiO3	0.54437	8.9117	5.113	0.71661	0.75031	0.16282		3.36056	55.0145	31.5641	4.42384	4.63188	1.00514
PO3	1.8109	9.2414	10.332	1.0039	2.0294	0.51292		7.26379	37.0686	41.4432	4.02679	8.14022	2.0574
CN	91.002	36.964	43.397	3.7812	111.362	72.562		25.3439	10.2944	12.086	1.05306	31.0142	20.2084
PAHs	30.127	16.935	39.43	0	38.184	133.68		11.661	6.55491	15.2619	0	14.7796	51.7426
C3H7	0.27549	0.03489	0.04562	0.60025	0.18696	0.01069		23.8748	3.02375	3.95399	52.0194	16.2021	0.92599
EC	110.09	48.392	47.512	6.3082	2.5406	175.38		28.2121	12.4011	12.1756	1.61656	0.65106	44.9436
OC	70.102	38.66	56.299	2.1336	64.726	165		17.6615	9.73998	14.1839	0.53754	16.307	41.57
ECOC	0	0	7.8016	0.46252	0.16354	16.15		0	0	31.7427	1.88187	0.6654	65.7101
LEV	1.0032	1.6449	0	0.27869	21.6574	0		4.08067	6.69089	0	1.13361	88.0948	0
